1 **Title:** Will Current Protected Areas Harbour Refugia for Threatened Arctic Vegetation Types until 2050?  
2 A First Assessment

3

4 **Authors:** Merin R. Chacko<sup>1</sup>, Ariane K.A. Goerens<sup>1</sup>, Jacqueline Oehri<sup>1</sup>, Elena Plekhanova<sup>1</sup> and Gabriela  
5 Schaepman-Strub<sup>1</sup>

6

7 <sup>1</sup> Department of Evolutionary Biology and Environmental Studies, University of Zurich

8 Winterthurerstrasse 190, 8057 Zurich, Switzerland

9

10 **Correspondence:**

11 Gabriela Schaepman-Strub

12 University of Zurich

13 Winterthurerstrasse 190, 8057 Zurich, Switzerland

14 [gabriela.schaepman@ieu.uzh.ch](mailto:gabriela.schaepman@ieu.uzh.ch)

15 +41 44 635 4806

16

17 **Funding:** This work was supported by the University Research Priority Programme Global Change and  
18 Biodiversity of the University of Zurich.

19

20 **Author approvals:** All authors have seen and approved the manuscript, and confirm that it has not  
21 been accepted or published elsewhere.

22

23 **Declaration of interest:** The authors declare that they have no known competing financial interests or  
24 personal relationships that could have appeared to influence the work reported in this paper.

25

26 **Keywords:** global change, arctic conservation, tundra vegetation, CAVM, vegetation shifts, climate  
27 change refugia

28 Abstract

29 Arctic vegetation types provide food and shelter for fauna, support livelihoods of Northern peoples, and  
30 are tightly linked to climate, permafrost soils, lakes, rivers, and the ocean through carbon, energy, water,  
31 and nutrient fluxes. Despite its significant role, a comprehensive understanding of climate change ef-  
32 fects on Arctic vegetation is lacking. We compare the 2003 baseline with existing 2050 predictions of  
33 circumpolar Arctic vegetation type distributions and demonstrate that abundant vegetation types with a  
34 proclivity for expansion contribute most to current protected areas. Applying IUCN criteria, we catego-  
35 rize five out of the eight assessed vegetation types as threatened by 2050. Our analyses show that  
36 current protected areas are insufficient for the mitigation of climate-imposed threats to these Arctic veg-  
37 etation types. Therefore, we located potential climate change refugia, areas where vegetation may re-  
38 main unchanged, at least until 2050, providing the highest potential for safeguarding threatened vege-  
39 tation types. Our study provides an essential first step to assessing vegetation type vulnerability in the  
40 Arctic, but is based on predictions covering only 46% of Arctic landscapes. The co-development of new  
41 protective measures by policymakers and indigenous peoples at a pan-Arctic scale requires more ro-  
42 bust and spatially complete vegetation predictions. This is essential as increasing pressures from re-  
43 source exploration and rapid infrastructure development complicate the road to a sustainable develop-  
44 ment of the rapidly thawing and greening Arctic.

45

46 1. Introduction

47 The Arctic experiences climate warming at twice the global mean<sup>1,2</sup>, leading to observed shifts in the  
48 distribution and composition of Arctic vegetation<sup>3</sup> that are projected to intensify in the future<sup>4</sup>. These  
49 changes may threaten not only endemic plant species but entire vegetation types and the associated  
50 ecosystem functions. Vegetation types provide habitats for sessile and migratory animal species<sup>5</sup>, sup-  
51 port livelihoods of Northern peoples<sup>6</sup> and take part in various feedbacks involving climate<sup>7-10</sup>, permafrost  
52 soils<sup>7,9,11</sup>, lakes, rivers, and the ocean through water, energy and carbon fluxes<sup>12,13</sup>.

53 Arctic vegetation is characterised by small vascular plants, bryophytes and lichens forming distinct plant  
54 communities, which are classified according to their functional types into fifteen vegetation types of the  
55 Circumpolar Arctic Vegetation Map (2003 CAVM)<sup>14</sup>. The southern border to the Arctic tundra is the  
56 treeline, which has been both observed and projected to advance northwards, decreasing the total

57 extent of the tundra while simultaneously displacing southern Arctic vegetation types<sup>15–18</sup>. Due to de-  
58 creasing snow cover and phenological changes, primary productivity and vascular plant biomass have  
59 been increasing, specifically that of tall shrubs<sup>9</sup>. This shrubification of the tundra has been widespread,  
60 resulting in a reduction in the abundance of less productive lichen- and moss-dominated vegetation  
61 types<sup>9,17,19–22</sup>. Widespread greening of the Arctic due to climate warming has long been identified<sup>23,24</sup>.  
62 However, spectral browning and increased heterogeneity of Arctic greening at the circumpolar scale  
63 have been observed in recent years<sup>17,25</sup>. Indeed, a modelling study forecasted that 48-84% of Arctic  
64 vegetation types will have shifted by 2050 due to the effects of climate change<sup>4</sup>.

65 Novel pressures beyond those posed by warming are arising in the Arctic due to increasing anthropo-  
66 genic presence. Historically, human land use and modification have been relatively low or non-existent  
67 in the Arctic biome. The human footprint map classifies most of the Arctic as under low pressure, and  
68 the human modification index demonstrates that the tundra remains thus far one of the last true terres-  
69 trial wild places on Earth<sup>26,27</sup>. However, human interest in Arctic commodities such as oil and gas are  
70 increasing due to rising global energy needs, and with it also the extent of disturbances that terrestrial  
71 ecosystems experience due to exploration and infrastructure development<sup>6,28</sup>. The effects of human  
72 disturbances and landscape processes such as climate and biota shifts on the distribution and compo-  
73 sition of vegetation over time must be explicitly included in effective conservation efforts. As vegetation  
74 in the Arctic is more fragile and requires longer times to recover from perturbation in comparison to  
75 southern vegetation<sup>28</sup>, it is both an ecological, political and economic imperative to have plans in place  
76 to mitigate and minimise these disturbances in order to provide a path towards the sustainable devel-  
77 opment of the Arctic.

78 As of 2016, 20.2% of the terrestrial Arctic area is protected to some degree<sup>29</sup>. Although conservation  
79 efforts in the Arctic are well-developed, their focus is generally at the species level rather than the scale  
80 of ecosystems<sup>30</sup>. In other biomes, the impact of climate change-induced biota shifts on conservation  
81 efforts has been recognised, and adaptive conservation strategies have been developed, though not  
82 widely implemented<sup>31</sup>. A recent systematic study identified areas with high potential for the persistence  
83 of multiple biodiversity elements under climate change in North America, and demonstrated that at the  
84 biome-scale, ~80% of areas within the top quintile of future conservation importance lacked formal  
85 protection, though this study excluded the High Arctic due to lacking data<sup>32</sup>. Additionally, needs in the  
86 North are influenced by rapid change at global scales and can no longer be addressed solely by local

87 actions<sup>30</sup>. Indeed, local studies of Arctic plant communities do not always mirror observational trends  
88 over more extended temporal periods, which tend to be heterogeneous and complex<sup>17,24</sup>. Conservation  
89 actions which operate at various scales of space, time and biological organisation may be required to  
90 effectively prevent the loss of potentially vulnerable ecosystems and their functions.

91 Refugia have become a focus of interest in conservation, as they have been demonstrated to enable  
92 the persistence of biodiversity over longer temporal scales and changing climates while retaining eco-  
93 system and habitat functions<sup>33,34</sup>. Vegetation refugia can be defined as areas where existing vegetation  
94 will remain within current suitable climate conditions<sup>35</sup>. Refugia may serve as a means for giving plant  
95 communities the time needed to allow for local adaptation to new environmental states by providing  
96 habitats where the effects of climate change are least felt in the short-term<sup>36</sup>. The identification and  
97 protection of refugia may facilitate the persistence of retreating vegetation types under projected an-  
98 thropogenic climate change<sup>37,38</sup>.

99 Presently, protected areas in the Arctic have not been established with climate change-induced vege-  
100 tation shifts in mind. Consequently, there is no consensus as to the current state of vegetation vulner-  
101 ability in the Arctic. Additionally, as Arctic vegetation shifts, protected areas of today may no longer  
102 protect the same vegetation to the same extent in the future. Vegetation distribution projections for the  
103 year 2050<sup>39</sup> provide the opportunity to locate vegetation refugia in the Arctic. Conservation according  
104 to vegetation refugia could, in effect, protect species at higher trophic levels in the food web through  
105 trophic cascades. However, to date, a comprehensive overview of vegetation refugia and their protected  
106 status in the Arctic has been unavailable.

107 The objective of this study is to establish an overview of vegetation type abundance in Arctic protected  
108 areas and assess their vulnerability. For this purpose, we utilised the 2003 CAVM as the baseline abun-  
109 dance of Arctic vegetation types within and outside of current protected areas. We then determined the  
110 distribution of Arctic vegetation types within protected areas using previously existing 2050 vegetation  
111 scenarios<sup>39</sup>. Furthermore, we assessed the risk of collapse of the vegetation types following the IUCN  
112 Red List of Ecosystems criteria for the baseline and the future<sup>40</sup>. Lastly, to inform conservation efforts,  
113 we located potential refugia for the vegetation types that had been identified as threatened.

114 2. Materials and Methods

115 2.1. Baseline status of vegetation type abundance in protected areas

116 We defined the network of protected areas in the Arctic according to their extent in the Map of Arctic  
117 Protected Areas (MAPA)<sup>29</sup>. The protected areas were treated as one network regardless of the six  
118 management categories within the map, as our focus was on the collective pan-Arctic protection status.  
119 We utilised the 2003 CAVM to determine the baseline distribution of Arctic vegetation types within pro-  
120 tected areas, which included fifteen distinct vegetation types (Appendix A) as well as the non-vegetative  
121 glacier class<sup>14,41</sup>. We intersected the 2003 CAVM with MAPA and computed a zonal histogram. This  
122 resulted in the pixel count of the protected area for each vegetation type in order to obtain the total and  
123 absolute areas of the vegetation types present within protected areas.

124 2.2. Future status of vegetation type abundance in protected areas

125 The bases for all analyses concerning future vegetation type distribution were the 36 Maps of Future  
126 Arctic Vegetation Distribution (MFAVD), which predicted climate change-induced vegetation shifts for  
127 2050<sup>4</sup>. Two machine learning methods for ecological niche modelling, three climate models, two emis-  
128 sions scenarios, and three tree dispersal scenarios had been applied to create 36 predictions<sup>4</sup>. The  
129 MFAVDs are the result of all possible combinations of the parameters named above. Areas covered by  
130 glaciers, barren lands and wetlands were excluded in the predictions, but tree cover was incorporated  
131 to illustrate the northward treeline shift of the taiga. We intersected all 36 MFAVDs with MAPA to obtain  
132 the complete range of possible outcomes. We selected an MFAVD that we deemed to be most realistic  
133 (hereafter 'realistic model'): random forest machine learning because it was the one with slightly higher  
134 accuracy<sup>4</sup>; the intermediate of the three global climate models (i.e. CSIRO); the higher of the two emis-  
135 sions scenarios, A2a<sup>42</sup>; and the intermediate tree dispersal of 20 km, as it represents the highest rate  
136 at which trees have been observed to disperse northward in Alaska and Canada<sup>16,43</sup>.

137 We analysed the eight vegetation types available in the MFAVDs out of the fifteen originally present in  
138 the 2003 CAVM, as barren (four classes) and wetlands (three classes) had been excluded from the  
139 predictions<sup>4</sup>. To assess the future distribution and protection status of Arctic vegetation, we converted  
140 MAPA from a polygon to a 4.5-km resolution raster to match the spatial resolution of the MFAVDs and  
141 attributed the protection status to every pixel. Finally, we summed the pixels and obtained the number  
142 of pixels per total as well as per protected area for each vegetation type.

143 2.3. Vulnerability of Arctic vegetation types following IUCN criteria

144 We applied the “IUCN Red List of Ecosystems Categories and Criteria” to quantify the vulnerability of  
145 Arctic vegetation types<sup>40</sup>. The IUCN provides guidelines to assess the risk of ecosystem collapse, which  
146 are designed to be applicable for various kinds of ecosystems. Here, we defined ecosystems as the  
147 CAVM vegetation types, as they represent over 400 plant communities classified into broader functional  
148 groups<sup>41</sup>. The IUCN assigns one of three graded categories to threatened ecosystems: “vulnerable”,  
149 “endangered” and “critically endangered”. We did not differentiate here between the two graded cate-  
150 gories for unthreatened ecosystems (“not threatened” and “least concern”) and instead simply summa-  
151 rised them as “not threatened”.

152 Five criteria are used to determine the IUCN risk category of the ecosystem: “reduction in geographic  
153 distribution”, “restricted in geographic distribution”, “environmental degradation”, “disruption of biotic  
154 processes or interactions”, and “quantitative analysis that estimates the probability of ecosystem col-  
155 lapse”<sup>40</sup>. It is recommended that as many criteria as possible are assessed, as the ultimate classification  
156 of risk is determined as the highest of the five criteria<sup>40</sup>. At the pan-Arctic scale, data were only available  
157 for “restricted distribution” and “decline of distribution”; therefore, this study could only assess these two  
158 criteria. Hence, our results represent the minimum risk status that each vegetation type can be as-  
159 signed. Analyses of the remaining three criteria could potentially result in a higher risk category.

160 To determine the “restricted distribution” criterion classification, the number of 10×10 km grid cells oc-  
161 cupied by the ecosystem must be calculated. An ecosystem is classified as “vulnerable”, “endangered”,  
162 or “critically endangered” if it occupies at most 50, 20 or 2 grid cells, respectively<sup>44</sup>. After the total extent  
163 of each vegetation type within the 2003 CAVM was calculated in square kilometres, the extents were  
164 divided by 100 to determine the number of 10×10 grid cells occupied by the vegetation type across the  
165 pan-Arctic extent. The “decline of distribution” criterion is determined by the predicted relative reduction  
166 in the distribution of an ecosystem over fifty years. An ecosystem is classified as “vulnerable”, “endan-  
167 gered”, or “critically endangered”, if the reduction in its spatial extent is at least 30%, 50% or 80%,  
168 respectively<sup>44</sup>. In this analysis, the relative changes in area were calculated according to the changes  
169 between the 2003 CAVM<sup>14</sup> and the 2050 MFAVDs<sup>4</sup>; therefore, the classification is based on the pre-  
170 dicted relative reduction over 47 rather than 50 years.

171 2.4. Identification of potential refugia for threatened vegetation types

172 For the threatened vegetation types, we identified areas which may serve as refugia, i.e. where a veg-  
173 etation type is present in the baseline and is predicted to persist at least until 2050. We overlaid the  
174 realistic model with the 2003 CAVM and selected the areas where the pixels remained unchanged to  
175 create a map of areas with persistent vegetation types. We did not consider areas where these vege-  
176 tation types had been predicted to shift to, and only considered the areas where the vegetation re-  
177 mained the same, as a) the predictions of future vegetation distribution contain a measure of uncer-  
178 tainty, b) there is evidence of lag effects in species-scale responses to climate change<sup>45</sup>, and c) con-  
179 siderable variability in their ability to track new climatic niches exists<sup>46</sup>.

180 Spatial data were analysed using ArcMap 10.5.1<sup>47</sup> and RStudio 1.2.5033<sup>48,49</sup>. Maps were converted into  
181 the Lambert Azimuthal Equal Area Polar Projection to preserve area, a crucial feature for this analysis.

182 3. Results

183 3.1. Baseline status of vegetation type abundance in protected areas

184 The terrestrial pan-Arctic region covers over 7.1 million km<sup>2</sup>, 20.2% of which is protected. Of the vege-  
185 tated areas (4.7 million km<sup>2</sup>), 21% — or approximately 977,000 km<sup>2</sup> — fall within protected areas. Ad-  
186 ditionally, a significant part of the protected areas encompass glaciated areas (777,000 km<sup>2</sup>), but could  
187 not be considered within the scope of this study due to a lack of predictions.

188 Our analysis demonstrates that the fifteen vegetation types have substantially different absolute and  
189 relative spatial abundances in the pan-Arctic tundra (Figure 1). The most abundant vegetation type (S1,  
190 erect dwarf-shrub tundra) covers over six times more area than the least abundant vegetation type (W1,  
191 sedge/grass, moss wetland), 626,000 km<sup>2</sup>, and 102,000 km<sup>2</sup>, respectively. The abundances of the veg-  
192 etation types within protected areas generally mirror their abundance at the pan-Arctic scale. For ex-  
193 ample, 11.4% of Arctic vegetation is composed of the G3 vegetation type (nontussock sedge, dwarf-  
194 shrub, moss tundra), which accordingly covers 11.3% of protected areas. Notable exceptions do occur,  
195 such as the wetland types. In comparison to their total extents (W1: sedge/grass, moss wetland, 2.0%;  
196 W2: sedge, moss, dwarf-shrub wetland, 2.7%; W3: sedge, moss, low-shrub wetland, 3.7%), they are  
197 overrepresented within protected areas (W1, 3.0%; W2, 4.8%; W3, 6.7%). Contrastingly, though 10.8%  
198 of Arctic vegetation is composed of the vegetation type B2 (cryptogam barren complex, bedrock), it  
199 spans only 2.5% of the protected area. In terms of absolute extents, the most abundant types at pan-



200 Arctic scales are overrepresented in protected areas, while the least abundant types are underrepre-  
201 sented.

### 202 3.2. Predicted vegetation type abundance in protected areas by 2050

203 Compared to the baseline abundances of vegetation types, the assessment of predicted abundances  
204 across protected areas by 2050 includes only eight vegetation types (see section 2.2). Predictions for  
205 the vegetation types within the barren (25.6% of non-glaciated terrestrial protected areas, 260,000 km<sup>2</sup>)  
206 and wetland (14.5% of non-glaciated terrestrial protected areas, 148,000 km<sup>2</sup>) classes were unavailable.  
207 Additionally, as the nearly 777,000 km<sup>2</sup> of glaciated protected areas were lacking in predictions, they  
208 were excluded from the study. The results differed considerably between the 36 MFAVDs: between  
209 48,000 (0.1%) and 1,826,000 km<sup>2</sup> (39.9%) of the total area covered by tundra vegetation in the 2003  
210 CAVM is predicted to be replaced by taiga<sup>4</sup>. Hence, considerable differences also resulted in the pre-  
211 dictions of single vegetation types as a function of MFAVDs. We restrict the presentation of results to  
212 our selected realistic model and present results of the other MFAVDs as an envelope around this model  
213 result. Of the eight vegetation types, five are predicted to decline in their total area according to the  
214 realistic model, accompanied by a mirrored decline in their abundance within the protected area network  
215 (Figure 2). In contrast, two southern vegetation types (S2: low shrub tundra and G3: nontussock sedge,  
216 dwarf-shrub moss tundra) are predicted to gain in area, both within and outside of protected areas.  
217 Vegetation type G4 (tussock sedge, dwarf shrub, moss tundra) showed a decrease in total area, yet its  
218 abundance within the protected area network increased.

### 219 3.3. Vulnerability of Arctic vegetation types following IUCN criteria

220 To determine the risk of collapse for the eight vegetation types, we analysed two spatial criteria: “re-  
221 striction of distribution” and “decline of distribution”; the final assigned category of risk was determined  
222 as the higher of these two. The “restriction of distribution” criterion diagnosed none of the eight vegeta-  
223 tion types as threatened because each vegetation type has an extent of at least 5,000 km<sup>2</sup>. The “decline  
224 in distribution” criterion assigned different results (Figure 3). Depending on the MFAVD, the specific risk  
225 status assigned to each type varied. Under the realistic model, one vegetation type (P1: prostrate dwarf-  
226 shrub, herb tundra) was classified as critically endangered. Four vegetation types were classified as  
227 endangered (G1: rush/grass forb, cryptogam tundra; G2: graminoid, prostrate dwarf-shrub, forb tundra;  
228 P2: prostrate/hemiprostrate dwarf-shrub tundra; S1: erect dwarf-shrub tundra), and three as not threat-  
229 ened (G3: nontussock sedge, dwarf-shrub, moss tundra; G4: tussock sedge, dwarf-shrub, moss tundra;



230 S2: low shrub tundra). The threatened vegetation types (i.e., those classified at least as endangered)  
231 are generally the more northern types with sparse, low-growing, non-vascular vegetation.

### 232 3.4. Potential refugia for threatened vegetation types

233 For the five vegetation types (G1, G2, P1, P2, S1) classified as threatened under the realistic model,  
234 we determined refugia, regions where these vegetation types are predicted to persist until 2050 (Figure  
235 4, Appendix C). The total area of refugia ranges from < 9,000 km<sup>2</sup> (P2) to > 100,000 km<sup>2</sup> (S1), account-  
236 ing for 2.1% and 8.7% of currently protected areas. The refugia are scattered over Canada, Greenland,  
237 Norway, Russia, and the USA (Figures 4a-d).

## 238 4. Discussion

239 We evaluated the capability of the current Arctic network of protected areas for the conservation of  
240 Arctic vegetation types. Our results demonstrate that all Arctic vegetation types are found within the  
241 protected areas, and their relative abundance significantly varied, but generally followed the same pat-  
242 tern as seen at pan-Arctic scale. Noticeably, wetlands tend to be protected to an above-average extent;  
243 this is likely due to conservation efforts focusing on Wetlands of International Importance (Ramsar sites)  
244 related to their protection as breeding areas for migrating birds<sup>29</sup>.

245 The impacts of climate change may demand the adaptation of protected areas<sup>31,50</sup>, as they may no  
246 longer harbour the same vegetation types. Thus, we analysed the protection and threat status of the  
247 vegetation type abundances predicted for the year 2050. The two most productive vegetation types (G3  
248 and S2) occupying the lower southern bioclimatic zones were demonstrably increasing in extent. The  
249 five vegetation types which were predicted to decline drastically currently occupy the three more north-  
250 ern bioclimatic zones<sup>39</sup> and are characterised by sparse and low-growing vegetation<sup>51</sup>. Our results  
251 demonstrate that these northern vegetation types also decrease in their representation within protected  
252 areas. We attribute this to two reasons. First, protected areas are generally situated in more southern  
253 regions rather than the northernmost edges of the Arctic, where these northern vegetation types can  
254 find sanctuary. This interpretation is validated by the fact that the refugia we located are clustered  
255 around the northernmost edges of the terrestrial Arctic. In our realistic model, we observe them being  
256 especially abundant in the Canadian Archipelago, which contains most of the terrestrial High Arctic.  
257 The climate will stay unsuitable for southern vegetation types in these regions, at least until 2050. Sec-  
258 ondly, Arctic protected areas were not established with the conservation of vegetation types in mind<sup>6</sup>;

259 therefore, it stands to reason that vegetation types of conservation importance have not been recog-  
260 nised and hence prioritised.

261 4.1. Implications for flora, fauna and indigenous people if vegetation types are left unprotected  
262 Vegetation shifts have been observed to have outcomes for species and communities across trophic  
263 levels<sup>5,9</sup>. Threatened vegetation types may lead to the increased vulnerability of endemic flora and  
264 fauna, especially those that occur only in the High Arctic, which are most at risk. For example, there is  
265 evidence that vegetation exerts bottom-up control on caribou populations, as increasing shrubification  
266 decreases pasture quality<sup>52</sup>. This decline is exacerbated by the loss of lichen-rich vegetation types,  
267 which negatively affect caribou populations due to a loss of winter foraging options<sup>53,54</sup> and energy  
268 through increased methane emission if lichens are reduced in their diet<sup>55</sup>. Indigenous knowledge also  
269 shows that caribou populations have already adopted more northern migration patterns<sup>56</sup>. This can, in  
270 turn, have negative consequences for indigenous communities that depend on caribou for food and as  
271 economic resources<sup>54,57</sup>. Without focused conservation efforts on maintaining these vegetation types,  
272 the species depending on them will also become threatened with extinction.

273 4.2. Implications of land use change on threatened vegetation types if left unprotected  
274 Climate warming and technological advances have opened up the Arctic as a new frontier in economic  
275 development. Increasing interest in commodities such as oil, gas, and mineral resources will naturally  
276 lead to increased infrastructure requirements in the Arctic, which may, in turn, intensify disturbances of  
277 Arctic ecosystems. Surface disturbances such as road networks and settlements have led to permafrost  
278 degradation through soil warming<sup>58</sup>. Off-road vehicles like tundra tractors can destroy endemic vegeta-  
279 tion, and leave the tracks visible for decades as vegetation struggles to recover<sup>58</sup>. A study of the Alaska  
280 North Slope demonstrated that 34% of the area was affected by oil development by 2010<sup>59</sup>. Further  
281 exploration has already been proposed, such as a 3-D seismic survey covering 63,000 km of trails  
282 within the Arctic National Wildlife Refugia in Alaska<sup>60</sup>. A recent study demonstrated that this could result  
283 in mid-to-high level impacts on 122 km<sup>2</sup> of the area in question, leading to increased thermokarst for-  
284 mation and erosion, and negatively impacting moist vegetation types<sup>61</sup>. Additionally, vehicle tires are  
285 capable of significantly increasing the dispersal distance of southern invaders, such as *Salix lanata*,  
286 which has been found to occur in many road-side areas, replacing lichen and moss cover<sup>59</sup>. Local  
287 warming due to the settlements also generate pockets of suitable habitats in latitudes where southern  
288 vegetation could not otherwise persist<sup>58</sup>.

289 Permafrost thaw is critically threatening Arctic infrastructures<sup>62</sup> and their collapse can lead to dramatic  
290 consequences for terrestrial ecosystems and indigenous livelihoods. As the MFAVDs did not account  
291 for human land use modification, this study severely understates their effects on vegetation shifts. At  
292 the pan-Arctic scale, a combination of economic, geopolitical, climatic, infrastructure and ecological  
293 factors lead to uncertainty in the future spatial distribution of development pressures, and their degree  
294 of impact<sup>63</sup>. Therefore, it is essential to predefine conservation areas for the currently unprotected and  
295 threatened vegetation types before widespread development begins in the increasingly accessible Arc-  
296 tic. Complementing protected areas, biodiversity conservation schemes developed for other regions of  
297 the world, such as around mining sites, need to be adapted to Arctic conditions to prevent loss of veg-  
298 etation where industrial development outside of protected areas is allowed.

299 4.3. Implications of using climate change refugia for land conservation and management  
300 Globally protected areas are 10.6% richer in species diversity than non-protected areas<sup>64</sup>. Neverthe-  
301 less, conserving biodiversity using protected areas poses to be difficult under climate change. A study  
302 assessing the protected areas of Canada found that climate change will lead to over 40% of the pro-  
303 tected areas experiencing a change in biome type, with the total extent of the Canadian tundra standing  
304 to decline by 38-79%<sup>65</sup>. In order to most efficiently use limited resources and protect threatened vege-  
305 tation, efforts in in situ management must be focused on areas where the vegetation is likely to persist  
306 under global change, such as climate change refugia for vegetation. There is scepticism over the use  
307 of refugia as areas where vegetation may retreat until conditions in the surrounding environment be-  
308 come more favourable. Vegetation shifts due to climate warming are projected to continue and intensify;  
309 therefore, the time periods required until favourable conditions return may be longer than the existence  
310 of these refugia. However, they may serve a powerful purpose by buying time for the climate adaptation  
311 of vulnerable species and ecological communities<sup>36</sup>. Adjusting Arctic protection efforts in mitigating the  
312 consequences of global change with a focus on relatively transient climate change refugia may aid in a  
313 long-term transformation of these threatened vegetation types into novel community assemblages (i.e.  
314 ecological replacements) that have adapted to these environmental changes, while performing the  
315 same ecological and habitat functions<sup>36</sup>. This process has been documented in the late Quaternary<sup>66</sup>.

316 4.4. Limitations and urgent need for comprehensive predictions of Arctic vegetation type distri-  
317 bution

318 The aim of this study is to construct a first assessment of the protected status of Arctic vegetation types  
319 in light of climate change based on existing vegetation predictions. These predictions<sup>39</sup> were based on  
320 the 2003 CAVM, a vector map with polygons of 14 km minimum diameter<sup>41</sup>; thus for the sake of con-  
321 sistency, it was utilised by this study instead of the more recent raster version (2019 CAVM) that is  
322 resolved at 1 km<sup>51</sup>. Nevertheless, these disparities did not affect the results regarding the baseline risk  
323 status of the vegetation types; the general pattern of abundant vegetation types being better repre-  
324 sented within protected areas holds, regardless of the map used (Appendix B).

325 Increasing spatial resolution in future predictions could reveal pockets of vegetation occurring outside  
326 of the main macroclimatic niche of a vegetation type. Such pockets could accelerate the spread of  
327 vegetation types into surrounding areas should the climate become more favourable. Potentially, south-  
328 ern vegetation types could then disperse northward at faster rates than modelled<sup>4</sup>, increasing the dis-  
329 placement of northern vegetation types and potentially our risk classifications. This displacement may  
330 be balanced by potential northern micropockets which would increase the total extent of refugia. Nev-  
331 ertheless, these disparities did not affect the results regarding the present risk status of the vegetation  
332 types. Though the “decline in distribution” criterion could not be tested as MFAVDs do not exist for the  
333 2019 CAVM, none of the vegetation types of the 2019 CAVM showed a restricted distribution and were  
334 classified as unthreatened under the IUCN “restriction of distribution” criterion.

335 Due to limited data availability in the Arctic, we could only analyse two of the five IUCN criteria. There-  
336 fore, the assigned risk category only represents the minimal risk, and could potentially be higher, both  
337 in the present and in the future. Though it is recommended that as many criteria as possible are as-  
338 sessed, the IUCN Red List of Ecosystems was created with the purpose of flexibility in the use of data  
339 containing variations in quality and coverage<sup>40</sup>. Therefore, this risk assessment still provides valuable  
340 information as a starting point for future assessments as data availability increases.

341 The MFAVDs only rendered predictions for 46% of the pan-Arctic area. Specifically, they excluded  
342 glaciers (including nunataks), barren lands, and wetlands<sup>4</sup>. Subsequently, we were unable to assess  
343 the future distribution of wetland and barren vegetation types, classify their risk of collapse, and locate  
344 potential refugia. Therefore, our results do not take into consideration the potential of the assessed

345 vegetation types to disperse into areas currently covered by these unassessed vegetation types, and  
346 vice versa.

347 Glaciers currently cover nearly one-third of the Arctic<sup>41</sup>, but extensive climate change-induced glacier  
348 melt is predicted<sup>67,68</sup>. Vegetation succession following retreating glaciers in the Arctic follows the same  
349 patterns as elsewhere; however, these processes occur at larger temporal scales and may be less  
350 relevant for the next thirty years<sup>69,70</sup>. Vegetation growth response to warming is slower in the High Arctic  
351 than in the Low Arctic due to lower growing season temperatures, seasonal length and nutrient availa-  
352 bility<sup>71</sup>. In Svalbard, for instance, vascular plant establishment was highly limited for the first century  
353 after glacial retreat<sup>69</sup>. Additionally, vegetation can take up to 500 years to reach equilibrium after glacial  
354 retraction in Greenland<sup>12</sup>. Therefore, the inclusion of glaciers would have likely had limited impacts on  
355 the results for threatened vegetation types shown here for 2050. Nevertheless, they would be crucial  
356 for imminent studies which investigate the future of the terrestrial Arctic at longer timescales.

357 One-quarter of the terrestrial Arctic consists of barren lands<sup>41</sup>, which were excluded in this analysis.  
358 Therefore, the northern vegetation types may be less threatened than indicated by this study because  
359 they may expand into currently barren areas. The inclusion of barren lands in future studies would likely  
360 lead to predictions of northern vegetation types being slightly more abundant and increasing over cen-  
361 tennial periods. However, due to the slow response in the development of soils and vegetation, the time  
362 scales at which this northern expansion into barren lands occurs may be longer than the 47-year span  
363 of our study, and this expansion may be limited, as barren lands lack in soil sufficient enough to support  
364 vegetation<sup>4</sup>.

365 Wetlands constitute 7% of the Arctic vegetated area<sup>41</sup>. Predictions for future wetland distribution are  
366 particularly difficult due to the complexity of the hydrological processes regulating them<sup>72</sup>. Permafrost  
367 thaw, increasing precipitation, ice melt, and evaporation due to warming influence the abundance and  
368 distribution of surface water, indirectly affecting wetlands<sup>13,73</sup>. In the southern areas with discontinuous  
369 permafrost, ponds are generally in decline as permafrost thaw leads to increasing drainage<sup>74-76</sup>. Con-  
370 versely, thawing of continuous permafrost in the High Arctic has been shown to lead to an increasing  
371 abundance of thaw ponds<sup>75</sup>. In the Canadian Arctic, this trend of thermokarst pond formation has been  
372 shown to occur at rapid paces<sup>77</sup>. This pattern of wetland development means that generally, southern  
373 vegetation types would have more potential areas of expansion, whereas northern areas may become

374 further displaced by expanding wetland. We hypothesise that the inclusion of wetlands in this study  
375 could consequently have a reinforcing effect on the observed patterns of threatened vegetation types.  
376 While wetlands are crucial because of the abundance of migratory birds dependent on them, they make  
377 up a relatively small portion of the vegetated pan-Arctic and are generally better protected than other  
378 vegetation types. However, this may change significantly in the future due to climate change. Our study  
379 highlights the need for further focus on these ill-understood vegetation types in longer-term predictions.

380 The future vegetation shifts<sup>4</sup> were predicted under various assumptions about climate change and tree  
381 dispersal rate scenarios, which, though necessary, carry over to this study. Uncertainties in future veg-  
382 etation distributions are inherent to predictions that are based on climate models with many uncertain  
383 assumptions, where one model is no more or less valid than the other<sup>42</sup>. Our selection of the realistic  
384 future model with regard to climate and emission scenario is, therefore, subjective. There is a large  
385 spread of the vegetation type abundances across the models, making the results, especially for vege-  
386 tation types G1, G2, G4 and S1, more uncertain (figure 2 and appendix D). However, the general trend  
387 of increase in southern vegetation types and decrease in northern vegetation types still holds within and  
388 outside of protected areas, as demonstrated for most results by the minimum and maximum scenario  
389 envelope.

390 While land surface schemes for earth system models and vegetation development models are being  
391 adapted to Arctic tundra conditions, parameterisations at the Arctic tundra vegetation type level, includ-  
392 ing all vegetation types, need to be implemented, and biotic and abiotic interactions integrated with  
393 holistic modelling approaches, at pan-Arctic scale. Furthermore, inclusion of human land use scenarios  
394 (e.g. reindeer herding densities, potential mining sites, road development) will be necessary in future  
395 modelling efforts to allow for informed policies and decisions.

## 396 5. Conclusions

397 This study identifies baseline and future abundances of Arctic vegetation types within protected areas  
398 as well as potential climate change refugia for threatened vegetation types using the 2003 CAVM and  
399 existing predictions of future Arctic vegetation distribution. Though uncertainties exist within the maps  
400 provided here, the general trends seen in this study are valuable in guiding future conservation efforts.  
401 Further studies on the development of Arctic vegetation types which include the whole Arctic — includ-  
402 ing wetlands, barrens and ice-covered areas — are urgently needed. They could provide complete and

403 precise findings to improve and adapt conservation efforts to climate change-induced biota shifts. More-  
404 over, we recommend independent validation of these hypothetical predictions to better incorporate cli-  
405 mate change refugia into the designation of protected areas. This could potentially be achieved through  
406 recent validation methods which compare predictions of refugia to local measures of species richness,  
407 endemic species persistence, genetic diversity, plant functional traits and/or demographic variables<sup>78</sup>.

408 This study aims to shift the focus of pan-Arctic protection efforts towards higher scales of biological  
409 organisation, from species to communities and ecosystems, and in this case, vegetation types. Endemic  
410 tundra vegetation types face the threat of ecosystem collapse due to global change. The establishment  
411 of refugia for the vegetation types identified here could protect them as refugia have done over the  
412 history of life on earth<sup>66,67</sup>. The protection of vegetation refugia would additionally have positive effects  
413 on Arctic fauna and climate regulation through bottom-up biotic and abiotic interactions. However, the  
414 integration of vegetation types for climate change-adapted conservation in the Arctic requires urgent  
415 collaboration between policymakers and indigenous peoples, as the area becomes increasingly under  
416 pressure from exploration and rapid infrastructure development. As experienced in the recent decade,  
417 Arctic change is rapid. Extreme events, including extreme winter precipitation and summer drought, are  
418 already affecting Arctic ecosystems through major disturbance events such as extensive flooding and  
419 fires, adding yet another dimension of abrupt change to mitigate in the future. Without a plan already in  
420 place for the protection of these critically important Arctic landscapes, we cannot enable the sustaina-  
421 bility of economic and structural development in what is increasingly no longer one of the world's last  
422 truly wild places.



423 References

- 424 1. Walsh, J. E., Overland, J. E., Groisman, P. Y. & Rudolf, B. Ongoing climate change in the  
425 arctic. *Ambio* (2011) doi:10.1007/s13280-011-0211-z.
- 426 2. Collins, M. *et al.* Long-term climate change: Projections, commitments and irreversibility. in  
427 *Climate Change 2013: The Physical Science Basis. IPCC Working Group I Contribution to*  
428 *AR5.* (2013). doi:10.1017/CBO9781107415324.024.
- 429 3. Serreze, M. C. *et al.* Observational evidence of recent change in the northern high-latitude  
430 environment. *Clim. Change* (2000) doi:10.1023/A:1005504031923.
- 431 4. Pearson, R. G. *et al.* Shifts in Arctic vegetation and associated feedbacks under climate  
432 change. *Nat. Clim. Chang.* (2013) doi:10.1038/nclimate1858.
- 433 5. Wheeler, H. C., Høye, T. T. & Svenning, J. C. Wildlife species benefitting from a greener Arctic  
434 are most sensitive to shrub cover at leading range edges. *Glob. Chang. Biol.* (2018)  
435 doi:10.1111/gcb.13837.
- 436 6. CAFF. *Arctic Biodiversity Assessment. Status and trends in Arctic biodiversity. Conservation of*  
437 *Arctic Flora and Fauna. Arctic Biodiversity Assessment* (2013).
- 438 7. Juszak, I., Erb, A. M., Maximov, T. C. & Schaepman-Strub, G. Arctic shrub effects on NDVI,  
439 summer albedo and soil shading. *Remote Sens. Environ.* (2014)  
440 doi:10.1016/j.rse.2014.07.021.
- 441 8. Loranty, M. M., Goetz, S. J. & Beck, P. S. A. Tundra vegetation effects on pan-Arctic albedo.  
442 *Environ. Res. Lett.* (2011) doi:10.1088/1748-9326/6/2/029601.
- 443 9. Myers-Smith, I. H. *et al.* Shrub expansion in tundra ecosystems: Dynamics, impacts and  
444 research priorities. *Environ. Res. Lett.* (2011) doi:10.1088/1748-9326/6/4/045509.
- 445 10. Swann, A. L., Fung, I. Y., Levis, S., Bonan, G. B. & Doney, S. C. Changes in arctic vegetation  
446 amplify high-latitude warming through the greenhouse effect. *Proc. Natl. Acad. Sci. U. S. A.*  
447 (2010) doi:10.1073/pnas.0913846107.
- 448 11. Bonfils, C. J. W. *et al.* On the influence of shrub height and expansion on northern high latitude  
449 climate. *Environ. Res. Lett.* (2012) doi:10.1088/1748-9326/7/1/015503.

- 450 12. Lunt, D. J., de Noblet-Ducoudré, N. & Charbit, S. Effects of a melted greenland ice sheet on  
451 climate, vegetation, and the cryosphere. *Clim. Dyn.* (2004) doi:10.1007/s00382-004-0463-4.
- 452 13. Woo, M. K. & Young, K. L. High Arctic wetlands: Their occurrence, hydrological characteristics  
453 and sustainability. in *Journal of Hydrology* (2006). doi:10.1016/j.jhydrol.2005.07.025.
- 454 14. CAVM Team. Circumpolar Arctic Vegetation Map. (1:7,500,000 scale), Conservation of Arctic  
455 Flora and Fauna (CAFF) Map No. 1. *US Fish and Wildlife Service.(Anchorage, AK). Available*  
456 *at <http://www.geobotany.uaf.edu/cavm/>[Verified 1 August 15 July 2015]* (2003).
- 457 15. Chapin, F. S. & Starfield, A. M. Time lags and novel ecosystems in response to transient  
458 climatic change in arctic Alaska. *Clim. Change* (1997) doi:10.1023/A:1005337705025.
- 459 16. Lloyd, A. H., Rupp, T. S., Fastie, C. L. & Starfield, A. M. Patterns and dynamics of treeline  
460 advance on the Seward Peninsula, Alaska. *J. Geophys. Res. D Atmos.* (2002)  
461 doi:10.1029/2001jd000852.
- 462 17. Bjorkman, A. D. *et al.* Status and trends in Arctic vegetation: Evidence from experimental  
463 warming and long-term monitoring. *Ambio* (2020) doi:10.1007/s13280-019-01161-6.
- 464 18. Rundqvist, S. *et al.* Tree and shrub expansion over the past 34 years at the tree-line near  
465 Abisko, Sweden. *Ambio* (2011) doi:10.1007/s13280-011-0174-0.
- 466 19. Blok, D. *et al.* Shrub expansion may reduce summer permafrost thaw in Siberian tundra. *Glob.*  
467 *Chang. Biol.* (2010) doi:10.1111/j.1365-2486.2009.02110.x.
- 468 20. Elmendorf, S. C. *et al.* Plot-scale evidence of tundra vegetation change and links to recent  
469 summer warming. *Nat. Clim. Chang.* (2012) doi:10.1038/nclimate1465.
- 470 21. Sturm, M., Racine, C. & Tape, K. Increasing shrub abundance in the Arctic. *Nature* (2001)  
471 doi:10.1038/35079180.
- 472 22. Loranty, M. M. & Goetz, S. J. Shrub expansion and climate feedbacks in Arctic tundra.  
473 *Environmental Research Letters* (2012) doi:10.1088/1748-9326/7/1/011005.
- 474 23. Myneni, R. B., Keeling, C. D., Tucker, C. J., Asrar, G. & Nemani, R. R. Increased plant growth  
475 in the northern high latitudes from 1981 to 1991. *Nature* (1997) doi:10.1038/386698a0.

- 476 24. Myers-Smith, I. H. *et al.* Complexity revealed in the greening of the Arctic. *Nature Climate*  
477 *Change* (2020) doi:10.1038/s41558-019-0688-1.
- 478 25. Phoenix, G. K. & Bjerke, J. W. Arctic browning: extreme events and trends reversing arctic  
479 greening. *Global Change Biology* (2016) doi:10.1111/gcb.13261.
- 480 26. Kennedy, C. M., Oakleaf, J. R., Theobald, D. M., Baruch-Mordo, S. & Kiesecker, J. Managing  
481 the middle: A shift in conservation priorities based on the global human modification gradient.  
482 *Glob. Chang. Biol.* (2019) doi:10.1111/gcb.14549.
- 483 27. Venter, O. *et al.* Global terrestrial Human Footprint maps for 1993 and 2009. *Sci. Data* (2016)  
484 doi:10.1038/sdata.2016.67.
- 485 28. Kumpula, T., Pajunen, A., Kaarlejärvi, E., Forbes, B. C. & Stammler, F. Land use and land  
486 cover change in Arctic Russia: Ecological and social implications of industrial development.  
487 *Glob. Environ. Chang.* (2011) doi:10.1016/j.gloenvcha.2010.12.010.
- 488 29. CAFF & PAME. *Arctic Protected Areas: Indicator Report, 2017: Conservation of Arctic Flora*  
489 *and Fauna and Protection of the Arctic Marine Environment.* (2017).
- 490 30. Chapin, F. S., Sommerkorn, M., Robards, M. D. & Hillmer-Pegram, K. Ecosystem stewardship:  
491 A resilience framework for arctic conservation. *Glob. Environ. Chang.* (2015)  
492 doi:10.1016/j.gloenvcha.2015.07.003.
- 493 31. Heller, N. E. & Zavaleta, E. S. Biodiversity management in the face of climate change: A  
494 review of 22 years of recommendations. *Biological Conservation* (2009)  
495 doi:10.1016/j.biocon.2008.10.006.
- 496 32. Stralberg, D., Carroll, C. & Nielsen, S. E. Toward a climate-informed North American protected  
497 areas network: Incorporating climate-change refugia and corridors in conservation planning.  
498 *Conserv. Lett.* (2020) doi:10.1111/conl.12712.
- 499 33. Tzedakis, P. C., Lawson, I. T., Frogley, M. R., Hewitt, G. M. & Preece, R. C. Buffered tree  
500 population changes in a Quaternary refugium: Evolutionary implications. *Science* (80- ).  
501 (2002) doi:10.1126/science.1073083.
- 502 34. Morelli, T. L. *et al.* Managing climate change refugia for climate adaptation. *PLoS One* **11**, 1–

- 503 17 (2016).
- 504 35. Thorne, J. H. *et al.* Vegetation refugia can inform climate-adaptive land management under  
505 global warming. *Front. Ecol. Environ.* **18**, 281–287 (2020).
- 506 36. Morelli, T. L. *et al.* Climate-change refugia: biodiversity in the slow lane. *Front. Ecol. Environ.*  
507 **18**, 228–234 (2020).
- 508 37. Taberlet, P. & Cheddadi, R. Ecology: Quaternary refugia and persistence of biodiversity.  
509 *Science* (2002) doi:10.1126/science.297.5589.2009.
- 510 38. Noss, R. F. Beyond kyoto: Forest management in a time of rapid climate change.  
511 *Conservation Biology* (2001) doi:10.1046/j.1523-1739.2001.015003578.x.
- 512 39. Pearson, R. G. *et al.* Predicted Arctic vegetation distribution shifts under future climate change.  
513 (2013) doi:10.18739/A2V935.
- 514 40. Bland, L. M., Keith, D. A., Miller, R. M., Murray, N. J. & Rodriguez, J. P. *Guidelines for the*  
515 *application of IUCN Red List of ecosystems categories and criteria. Guidelines for the*  
516 *application of IUCN Red List of ecosystems categories and criteria* (2015).  
517 doi:10.2305/iucn.ch.2016.rle.1.en.
- 518 41. Walker, D. A. *et al.* The Circumpolar Arctic vegetation map. *J. Veg. Sci.* (2005)  
519 doi:10.1111/j.1654-1103.2005.tb02365.x.
- 520 42. IPCC. *IPCC Special Report on Emissions Scenarios (SRES) of Working Group III.* (2000)  
521 doi:citeulike-article-id:9904924.
- 522 43. Lescop-Sinclair, K. & Payette, S. Recent Advance of the Arctic Treeline Along the Eastern  
523 Coast of Hudson Bay. *J. Ecol.* (1995) doi:10.2307/2261175.
- 524 44. Dudley, N. *Guidelines for applying protected area management categories. Guidelines for*  
525 *applying protected area management categories* (2008). doi:10.2305/iucn.ch.2008.paps.2.en.
- 526 45. Stewart, L. *et al.* The regional species richness and genetic diversity of Arctic vegetation reflect  
527 both past glaciations and current climate. *Glob. Ecol. Biogeogr.* (2016) doi:10.1111/geb.12424.
- 528 46. La Sorte, F. A. & Jetz, W. Tracking of climatic niche boundaries under recent climate change.

- 529 *J. Anim. Ecol.* (2012) doi:10.1111/j.1365-2656.2012.01958.x.
- 530 47. ESRI. ArcMap 10.5.1 [GIS Software]. (2017).
- 531 48. R Development Core Team. R: A language and environment for statistical computing. *Vienna,*  
532 *Austria* (2017) doi:R Foundation for Statistical Computing, Vienna, Austria. ISBN 3-900051-07-  
533 0, URL <http://www.R-project.org>.
- 534 49. Team RStudio. RStudio: Integrated Development for R. *Rstudio Team, PBC, Boston, MA URL*  
535 *<http://www.rstudio.com/>* (2020).
- 536 50. Hannah, L., Midgley, G. F. & Millar, D. Climate change-integrated conservation strategies.  
537 *Glob. Ecol. Biogeogr.* (2002) doi:10.1046/j.1466-822X.2002.00306.x.
- 538 51. Reynolds, M. K. *et al.* A raster version of the Circumpolar Arctic Vegetation Map (CAVM).  
539 *Remote Sens. Environ.* (2019) doi:10.1016/j.rse.2019.111297.
- 540 52. Fauchald, P., Park, T., Tømmervik, H., Myneni, R. & Hausner, V. H. Arctic greening from  
541 warming promotes declines in caribou populations. *Sci. Adv.* (2017)  
542 doi:10.1126/sciadv.1601365.
- 543 53. Cornelissen, J. H. C. *et al.* Global change and arctic ecosystems: Is lichen decline a function of  
544 increases in vascular plant biomass? *J. Ecol.* (2001) doi:10.1046/j.1365-2745.2001.00625.x.
- 545 54. Joly, K., Jandt, R. R. & Klein, D. R. Decrease of lichens in Arctic ecosystems: The role of  
546 wildfire, caribou, reindeer, competition and climate in north-western Alaska. *Polar Research*  
547 (2009) doi:10.1111/j.1751-8369.2009.00113.x.
- 548 55. Hansen, K. K., Sundset, M. A., Folkow, L. P., Nilsen, M. & Mathiesen, S. D. Methane  
549 emissions are lower from reindeer fed lichens compared to a concentrate feed. *Polar Res.* **37**,  
550 (2018).
- 551 56. Ksenofontov, S., Backhaus, N. & Schaepman-Strub, G. 'There are new species': indigenous  
552 knowledge of biodiversity change in Arctic Yakutia. *Polar Geogr.* **42:1**, 34–57 (2019).
- 553 57. Nuttall, M. *et al.* Ch.12 Hunting, herding, fishing, and gathering: Indigenous peoples and  
554 renewable resource use in the Arctic. *Arct. Clim. Impact Assess.* (2005).

- 555 58. Forbes, B. C., Ebersole, J. J. & Strandberg, B. Anthropogenic disturbance and patch dynamics  
556 in circumpolar arctic ecosystems. *Conservation Biology* (2001) doi:10.1046/j.1523-  
557 1739.2001.015004954.x.
- 558 59. Raynolds, M. K. *et al.* Cumulative geocological effects of 62 years of infrastructure and  
559 climate change in ice-rich permafrost landscapes, Prudhoe Bay Oilfield, Alaska. *Glob. Chang.*  
560 *Biol.* (2014) doi:10.1111/gcb.12500.
- 561 60. SAExploration. Marsh Creek 3D plan of operationswinter seismic survey.  
562 [https://eplanning.blm.gov/public\\_projects/nepa/111085/153349/187888/Marsh\\_Creek\\_Plan\\_of](https://eplanning.blm.gov/public_projects/nepa/111085/153349/187888/Marsh_Creek_Plan_of)  
563 [\\_Operations\\_Submitted\\_May2018.pdf](#) (2018).
- 564 61. Raynolds, M. K. *et al.* Landscape impacts of 3D-seismic surveys in the Arctic National Wildlife  
565 Refuge, Alaska. *Ecol. Appl.* **0**, 1–20 (2020).
- 566 62. Hjort, J. *et al.* Degrading permafrost puts Arctic infrastructure at risk by mid-century. *Nat.*  
567 *Commun.* **9**, (2018).
- 568 63. Walker, D. A. & Peirce, J. L. *Rapid Arctic Transitions due to Infrastructure and Climate*  
569 *(RATIC): A contribution to ICARP III.* (2015).
- 570 64. Gray, C. L. *et al.* Local biodiversity is higher inside than outside terrestrial protected areas  
571 worldwide. *Nat. Commun.* (2016) doi:10.1038/ncomms12306.
- 572 65. Lemieux, C. J. & Scott, D. J. Climate change, biodiversity conservation and protected area  
573 planning in Canada. *Can. Geogr.* (2005) doi:10.1111/j.0008-3658.2005.00103.x.
- 574 66. Jackson, S. T. & Overpeck, J. T. Responses of plant populations and communities to  
575 environmental changes of the late Quaternary. *Paleobiology* (2000)  
576 doi:10.1017/s0094837300026932.
- 577 67. Alley, R. B. *et al.* History of the Greenland Ice Sheet: paleoclimatic insights. *Quat. Sci. Rev.*  
578 (2010) doi:10.1016/j.quascirev.2010.02.007.
- 579 68. Hinzman, L. D. *et al.* Evidence and implications of recent climate change in Northern Alaska  
580 and other Arctic regions. *Clim. Change* (2005) doi:10.1007/s10584-005-5352-2.
- 581 69. Hodkinson, I. D., Coulson, S. J. & Webb, N. R. Community assembly along proglacial

- 582 chronosequences in the high Arctic: Vegetation and soil development in north-west Svalbard.  
583 *J. Ecol.* (2003) doi:10.1046/j.1365-2745.2003.00786.x.
- 584 70. Raynolds, M. K. & Walker, D. A. Effects of deglaciation on circumpolar distribution of arctic  
585 vegetation. *Can. J. Remote Sens.* (2009) doi:10.5589/m09-006.
- 586 71. Walker, M. D. *et al.* Plant community responses to experimental warming across the tundra  
587 biome. *Proc. Natl. Acad. Sci. U. S. A.* (2006) doi:10.1073/pnas.0503198103.
- 588 72. Walvoord, M. A. & Kurylyk, B. L. Hydrologic Impacts of Thawing Permafrost-A Review. *Vadose*  
589 *Zo. J.* (2016) doi:10.2136/vzj2016.01.0010.
- 590 73. White, D. M., Craig Gerlach, S., Loring, P., Tidwell, A. C. & Chambers, M. C. Food and water  
591 security in a changing arctic climate. *Environ. Res. Lett.* (2007) doi:10.1088/1748-  
592 9326/2/4/045018.
- 593 74. Riordan, B., Verbyla, D. & McGuire, A. D. Shrinking ponds in subarctic Alaska based on 1950-  
594 2002 remotely sensed images. *J. Geophys. Res. Biogeosciences* (2006)  
595 doi:10.1029/2005JG000150.
- 596 75. Smith, L. C. Disappearing Arctic Lakes. *Science* (80- ). (2005) doi:10.1126/science.1108142.
- 597 76. Yoshikawa, K. & Hinzman, L. D. Shrinking thermokarst ponds and groundwater dynamics in  
598 discontinuous permafrost near Council, Alaska. *Permafr. Periglac. Process.* (2003)  
599 doi:10.1002/ppp.451.
- 600 77. Farquharson, L. M. *et al.* Climate Change Drives Widespread and Rapid Thermokarst  
601 Development in Very Cold Permafrost in the Canadian High Arctic. *Geophys. Res. Lett.* (2019)  
602 doi:10.1029/2019GL082187.
- 603 78. Barrows, C. W. *et al.* Validating climate-change refugia: empirical bottom-up approaches to  
604 support management actions. *Front. Ecol. Environ.* **18**, 298–306 (2020).
- 605



606 Figures

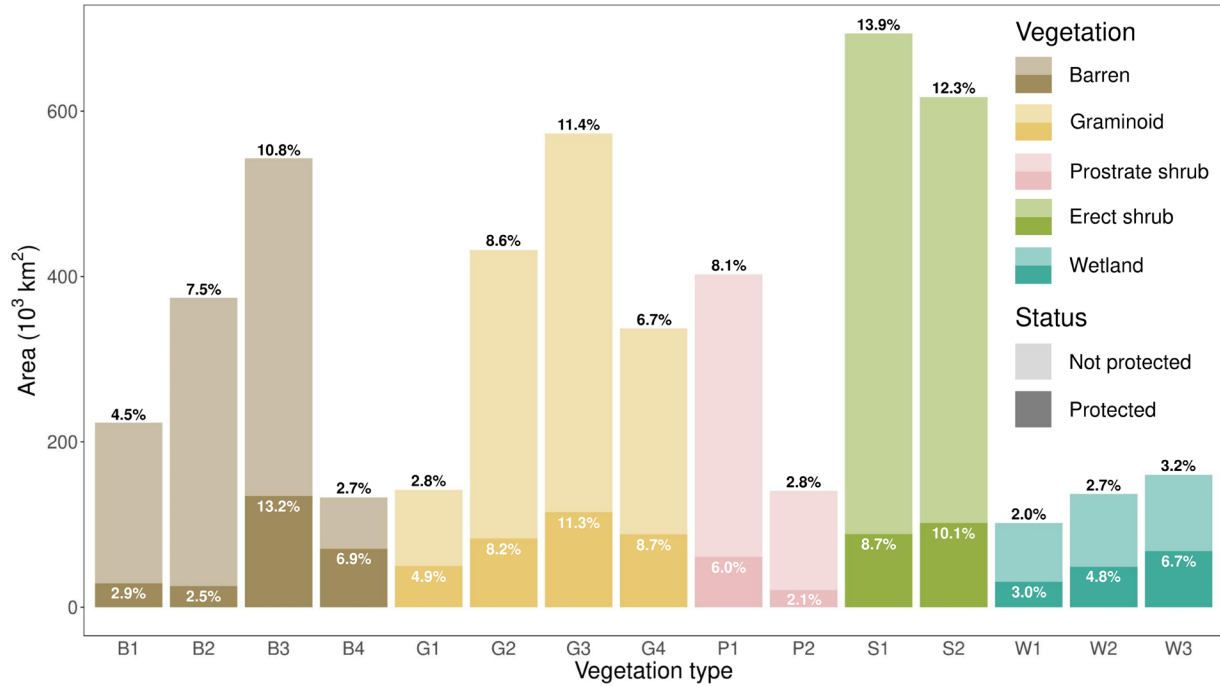

607

608 **Figure 1. The 2003 baseline abundance and protection status of Arctic vegetation types.** The Arctic tundra encompasses  
 609 approximately 4.7 million km<sup>2</sup>. The height of the bars represents the absolute extent of each vegetation type within and outside  
 610 of protected areas. The percentages above the bars represent the relative abundance of the vegetation type in the pan-Arctic  
 611 tundra. The percentages within the darker coloured bars (protected area) represent the relative abundance of each vegetation  
 612 type in the protected area in comparison to the total protected area. The vegetation types can be summarised into barren tundra  
 613 (B1: cryptogam herb barren; B2: cryptogam barren complex (bedrock); B3: noncarbonate mountain complex and B4: carbonate  
 614 mountain complex), graminoid tundra (G1: rush/grass forb, cryptogam tundra; G2: graminoid, prostrate dwarf-shrub, forb tundra;  
 615 G3: nontussock sedge, dwarf-shrub, moss tundra; G4: tussock sedge, dwarf-shrub, moss tundra), prostrate-shrub tundra (P1:  
 616 prostrate dwarf shrub, herb tundra; P2: prostrate/hemiprostrate dwarf-shrub tundra), erect-shrub tundra (S1: erect dwarf-shrub  
 617 tundra; S2: low shrub tundra) and wetlands (W1: sedge/grass, moss wetland; W2: sedge, moss, dwarf-shrub wetland; W3: sedge,  
 618 moss, low-shrub wetland).

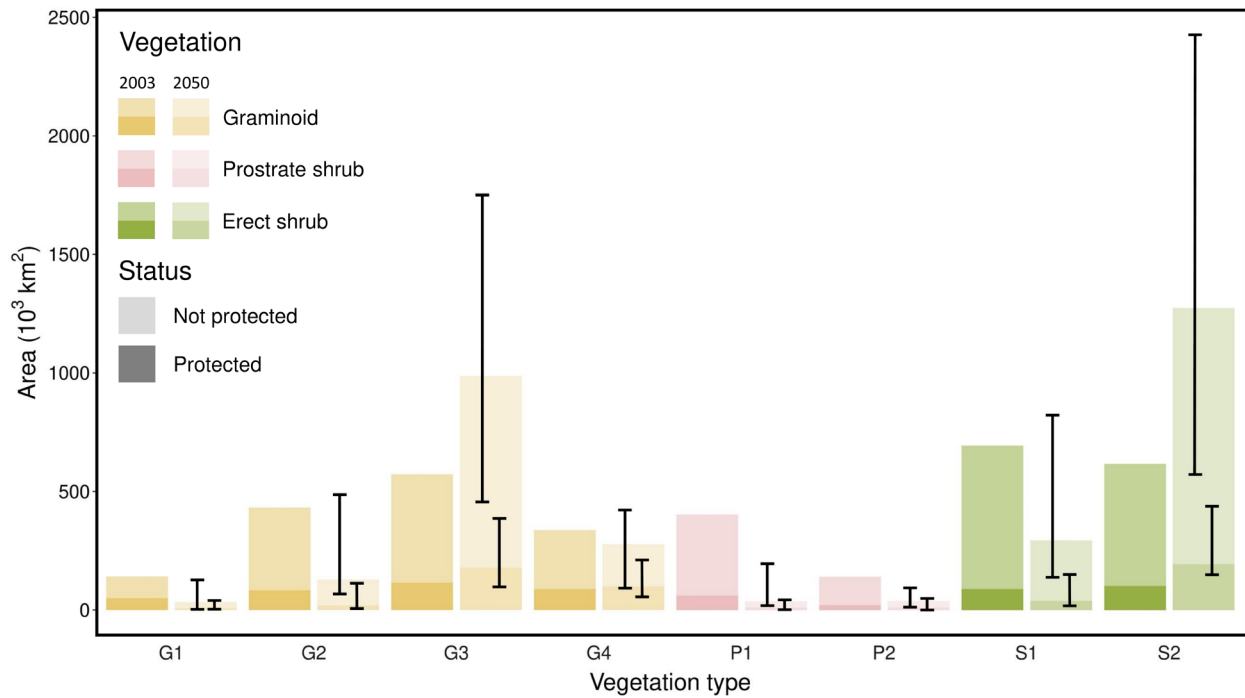

619

620 **Figure 2. A comparison of the abundance and protection status of Arctic vegetation types at the baseline and in the**  
 621 **future.** The data presented refers to the realistic model scenario; error bars represent the envelope of the minimal and maximal  
 622 abundance predicted by the different MFAVDs. The minimum and maximum values of the envelope are not always the result of  
 623 the same MFAVDs. Depending on the vegetation type, different models predict the highest or lowest abundance. The vegetation  
 624 types can be summarised into graminoid tundra (G1: rush/grass forb, cryptogam tundra; G2: graminoid, prostrate dwarf-shrub,  
 625 forb tundra; G3: nontussock sedge, dwarf-shrub, moss tundra; G4: tussock sedge, dwarf-shrub, moss tundra), prostrate-shrub  
 626 tundra (P1: prostrate dwarf shrub, herb tundra; P2: prostrate/hemiprostrate dwarf-shrub tundra), and erect-shrub tundra (S1:  
 627 erect dwarf-shrub tundra; S2: low shrub tundra). Barren and wetland vegetation types were not assessed as predictions for 2050  
 628 were unavailable.

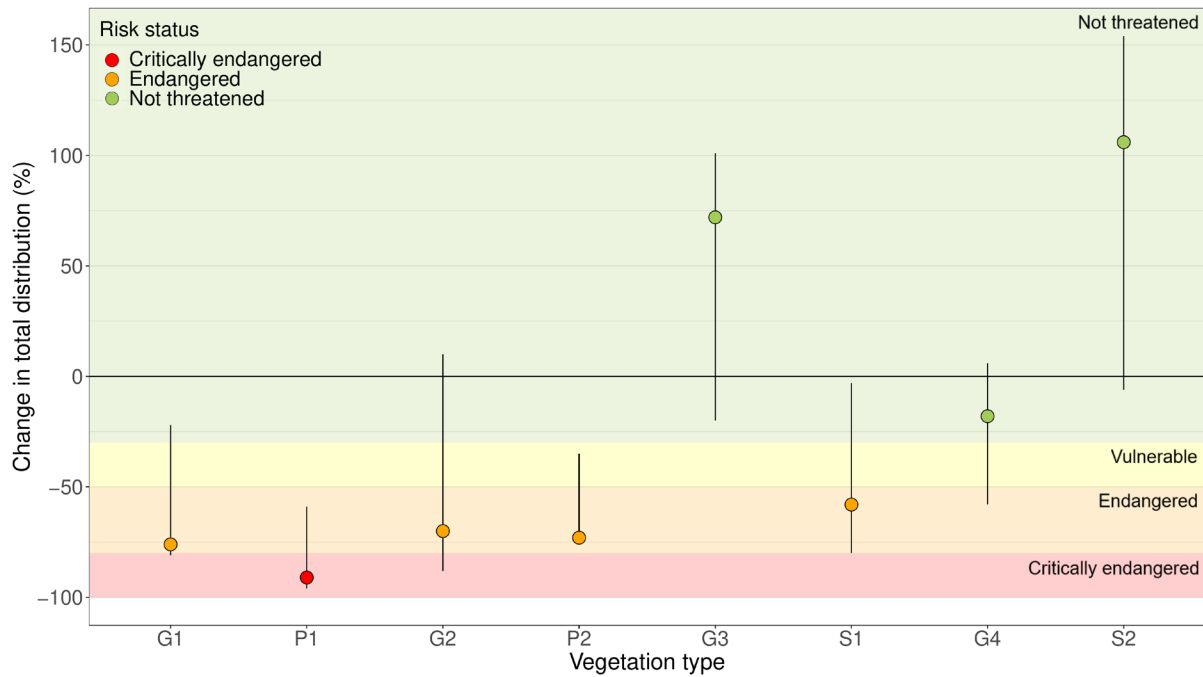

629

630 **Figure 3. Risk status according to the 'decline in distribution' criterion of the IUCN Red List of Ecosystems Categories**  
 631 **and Criteria under the realistic model.** The vegetation types are ordered along the bioclimatic subzones they occur in, from  
 632 low to high summer temperatures (left to right). The data presented refers to the realistic model scenario; error bars represent  
 633 the envelope of the minimal and maximal abundance predicted by the different MFAVDs. The minimum and maximum values of  
 634 the envelope are not always the result of the same MFAVDs. Depending on the vegetation type, different models predict the  
 635 highest or lowest abundance. The vegetation types can be summarised into graminoid tundra (G1: rush/grass forb, cryptogam  
 636 tundra; G2: graminoid, prostrate dwarf-shrub, forb tundra; G3: nontussock sedge, dwarf-shrub, moss tundra; G4: tussock sedge,  
 637 dwarf-shrub, moss tundra), prostrate-shrub tundra (P1: prostrate dwarf shrub, herb tundra; P2: prostrate/hemiprostrate dwarf-  
 638 shrub tundra), and erect-shrub tundra (S1: erect dwarf-shrub tundra; S2: low shrub tundra). Barren and wetland vegetation types  
 639 were not assessed as no predictions for 2050 were available.

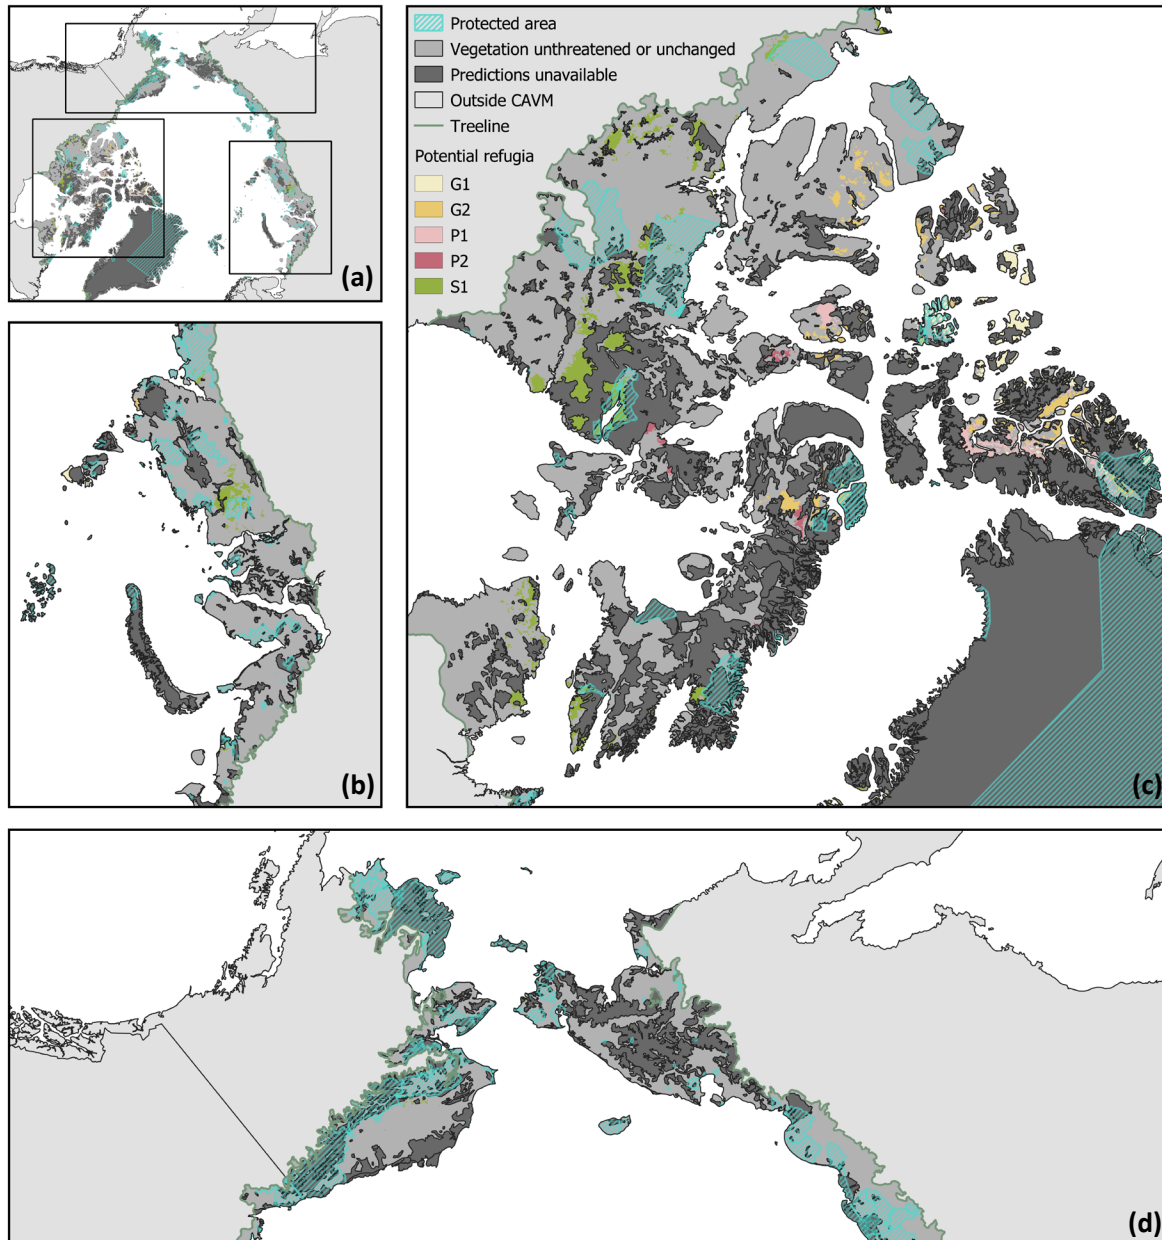

640

641 *Figure 4. Refugia maps of threatened vegetation types in the Arctic (a), and magnified subsets centred on the Yamal*  
642 *peninsula, Russia (b); the Canadian Archipelago (c); and Alaska, USA, and North-eastern Siberia, Russia (d). The vulner-*  
643 *able vegetation types presented here are G1: rush/grass forb, cryptogam tundra; G2: graminoid, prostrate dwarf-shrub, forb*  
644 *tundra; P1: prostrate dwarf shrub, herb tundra; P2: prostrate/hemiprostrate dwarf-shrub tundra and S1: erect dwarf-shrub tundra.*

645
